# Supplementary material for: The genome of Pelotomaculum thermopropionicum reveals niche-associated evolution in anaerobic microbiota
Source: HighWire-hosted journal article supplement (doi:10.1101/gr.7136508), 2008-01-24
Supplement: TableS2.pdf [file TableS2.pdf]

Table S2. General features of the *P. thermopropionicum* SI genome.

| General features                             |         |
|----------------------------------------------|---------|
| Length of sequence                           | 3025375 |
| G + C ratio (%)                              | 53.0    |
| Protein-coding sequences (CDS)               | 2920    |
| No. similar to known genes                   | 1637    |
| No. similar to genes of general function (R) | 227     |
| No. similar to genes of unknown function (S) | 170     |
| No. of genes not in COG database             | 886     |
| Coding density (%)                           | 86.3    |
| Average CDS size (bp)                        | 894     |
| No. of 5S-16S-23S                            | 2       |
| No. of tRNAs                                 | 51      |
