# Supplementary material for: The genome of Pelotomaculum thermopropionicum reveals niche-associated evolution in anaerobic microbiota
Source: HighWire-hosted journal article supplement (doi:10.1101/gr.7136508), 2008-01-24
Supplement: TableS7.pdf [file TableS7.pdf]

Table S7. PAS domain-containing CDSs in the *P. thermopropionicum* genome.

| Locus tag            | Output domain* | Description                | Proteins encoded by physically linked genes |
|----------------------|----------------|----------------------------|---------------------------------------------|
| One component system |                |                            |                                             |
| PTH0508              | HTH_3          | AAA-type ATPase            | Aldehyde:ferredoxin oxidoreductase          |
| PTH0546              | GGDEF          |                            | MoxR-like ATPases COG0714                   |
| PTH0752              | GntR           |                            | Hypothetical protein COG1719                |
| PTH0844              | LysR           | AAA-type ATPase, RocR-like | Pyruvate:ferredoxin oxidoreductase          |
| PTH0850              | AraC           | AAA-type ATPase, RocR-like | Class IV alcohol dehydrogenase              |
| PTH1192              | HTH_8          |                            | Acetyl-CoA carboxylase                      |
| PTH1355              | HTH_11         | AAA-type ATPase, RocR-like | Methylmalonyl-CoA pathway enzymes           |
| PTH1663              | GGDEF          |                            | Pyruvate:ferredoxin oxidoreductase          |
| PTH1772              | HTH_3          | AAA-type ATPase, RocR-like | Acyl CoA:acetate/3-ketoacid CoA transferase |
| PTH2004              | GGDEF          |                            | Arginine/lysine/ornithine decarboxylases    |
| PTH2615              | HD             |                            | Molybdopterin biosynthesis enzyme           |
| PTH2869              | CBF/NF-Y       | AAA-type ATPase            | Hypothetical protein                        |
| Two component system |                |                            |                                             |
| PTH0100              | LytR           |                            | Uncharacterized dehydrogenase               |
| PTH1349              | HTH_3          |                            | TRAP C4-dicarboxylate transporter           |
| PTH1422              | No RR          |                            |                                             |
| PTH1778              | No RR          |                            |                                             |
| PTH1830              | MarR           |                            | Predicted enzyme COG0325                    |
| PTH2257              | AraC           |                            | Predicted permeases COG0730                 |
| PTH2684              | LuxR           |                            | Tas alcohol dehydrogenase                   |

\*According to the pfam database. In two-component systems, those in neighboring response regulators are presented. No RR, no response regulator physically linked.
